# Supplementary material for: TIE1 and TEK signalling, intraocular pressure, and primary open-angle glaucoma: a Mendelian randomization study
Source: PubMed Central journal article supplement (PMC10668387; doi:10.1186/s12967-023-04737-9), 2023-11-24
Supplement: 12967_2023_4737_MOESM17_ESM.pdf [file 12967_2023_4737_MOESM17_ESM.pdf]

**Figure S2 – Leave-one-out plot for MR estimate of genetically proxied TIE1 and IOP**

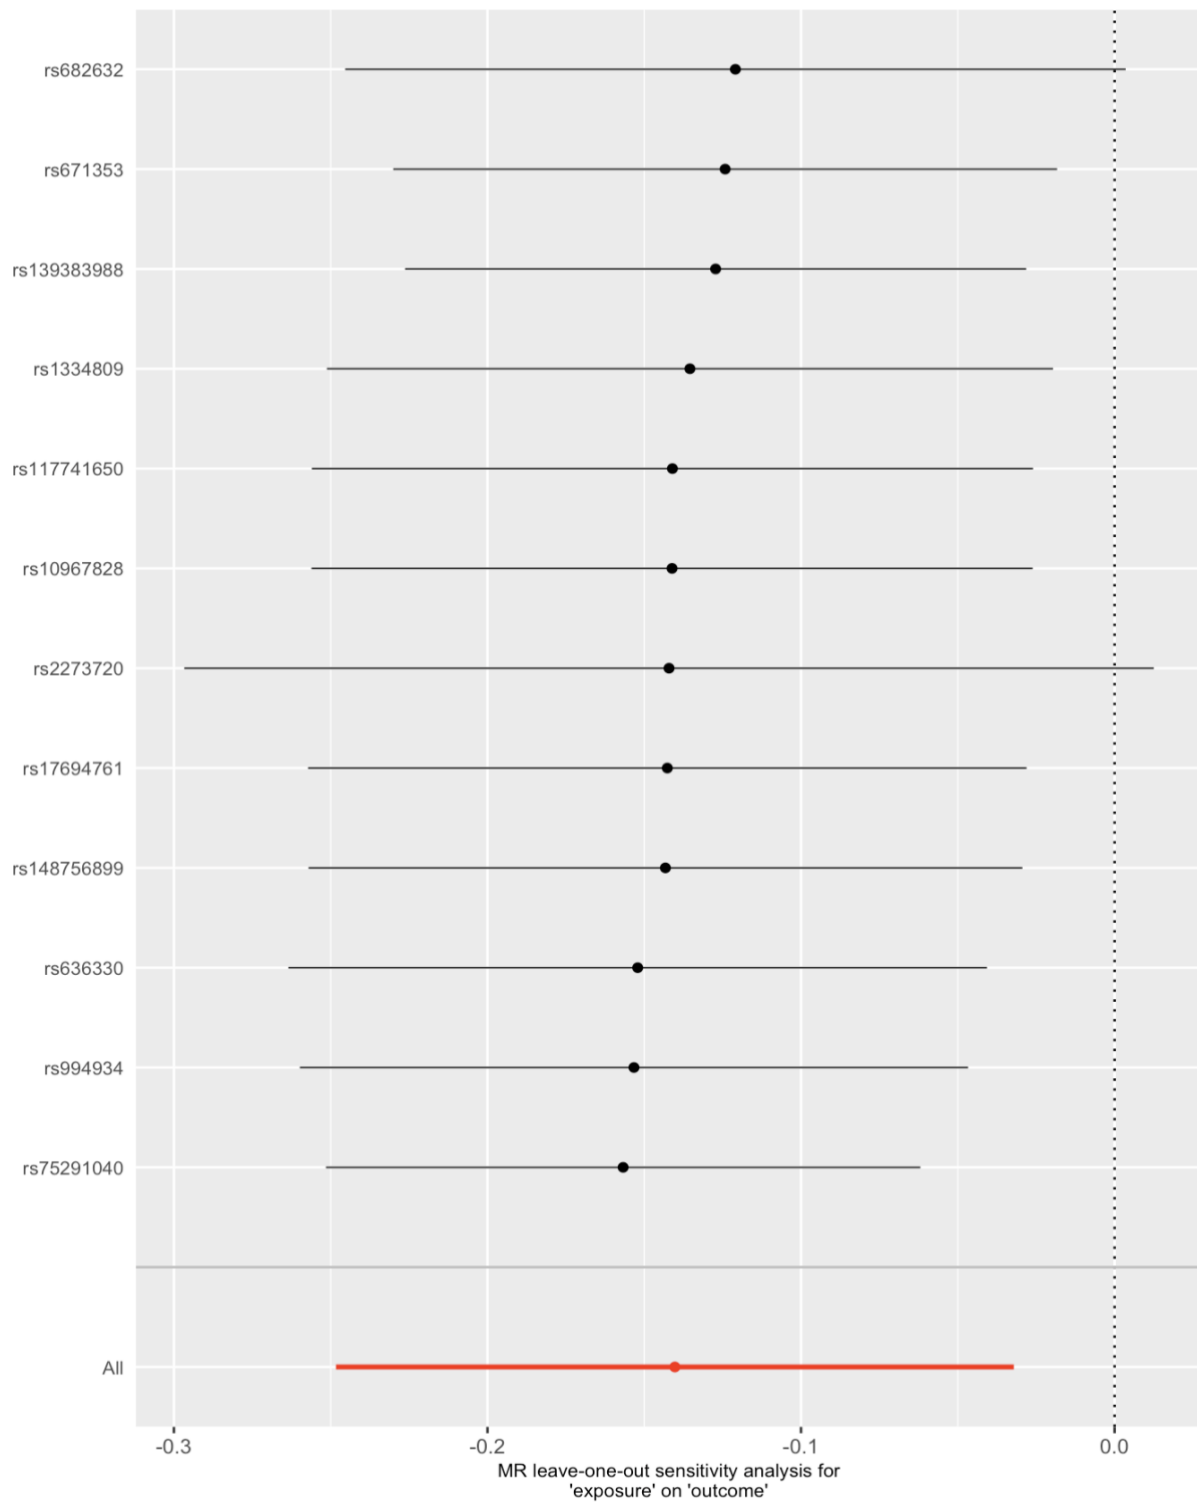

Exposure = increased genetically proxied TEK signalling; Outcome = IOP
