# Supplementary material for: TIE1 and TEK signalling, intraocular pressure, and primary open-angle glaucoma: a Mendelian randomization study
Source: PubMed Central journal article supplement (PMC10668387; doi:10.1186/s12967-023-04737-9), 2023-11-24

**Figure S4** – Scatter plot of the genetic associations of instrumental variants with sTEK and intraocular pressure.

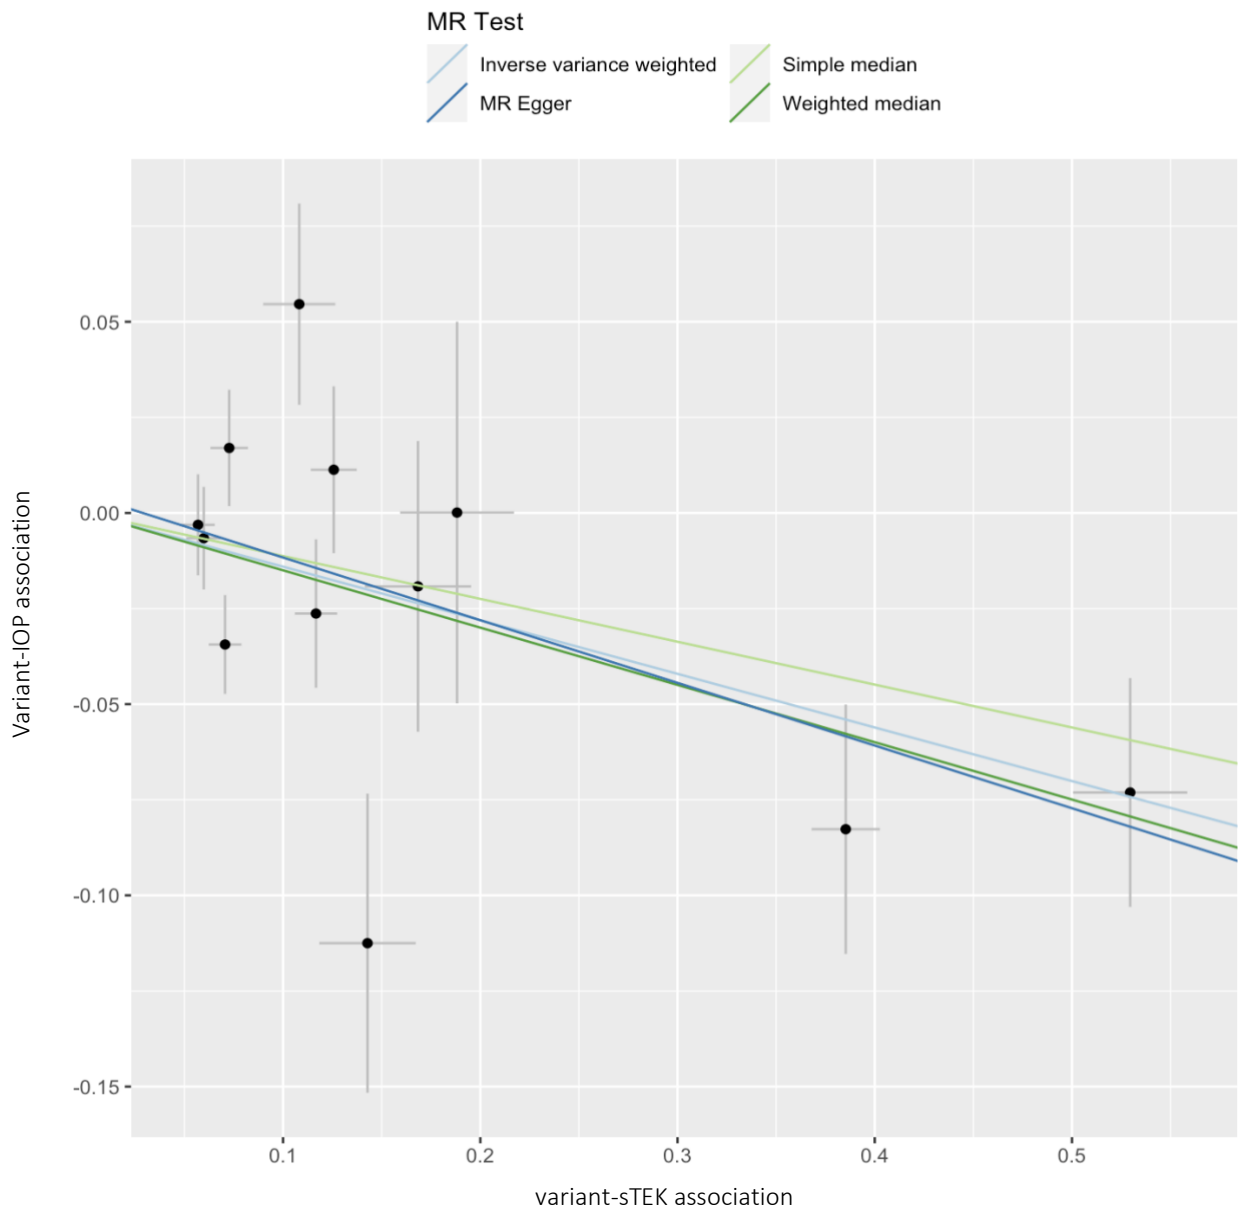

Supplement: 12967_2023_4737_MOESM19_ESM.pdf [file 12967_2023_4737_MOESM19_ESM.pdf]
